# Supplementary material for: CU(II)/Polydopamine-Modified Glass Fiber Separators Towards High-Performance Zinc-Ion Batteries
Source: Preprints.org preprint supplement (doi:10.20944/preprints202306.0719.v1), 2023-06-09
Supplement: Supplementary file 3 [file supplementary]

Supporting Information

Cu(II)/polydopamine-modified glass fiber separators towards high-performance zinc-ion batteries

Fengcan Ma, Kaixuan Xie, Siheng Wu, Chi Zhang, Xiaodie Liao, and Qinghong Wang*

*1School of Chemistry and Materials Science, Jiangsu Normal University, Xuzhou, Jiangsu 221116, China*

********Correspondence: wangqh@jsnu.edu.cn*


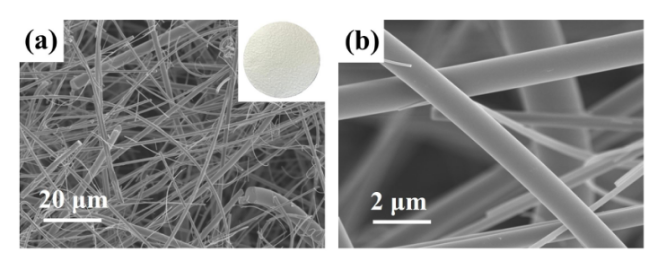


**Figure S1.** (a, b) SEM images of pristine GF separator. Insert in (a) is the photo of pristine GF.


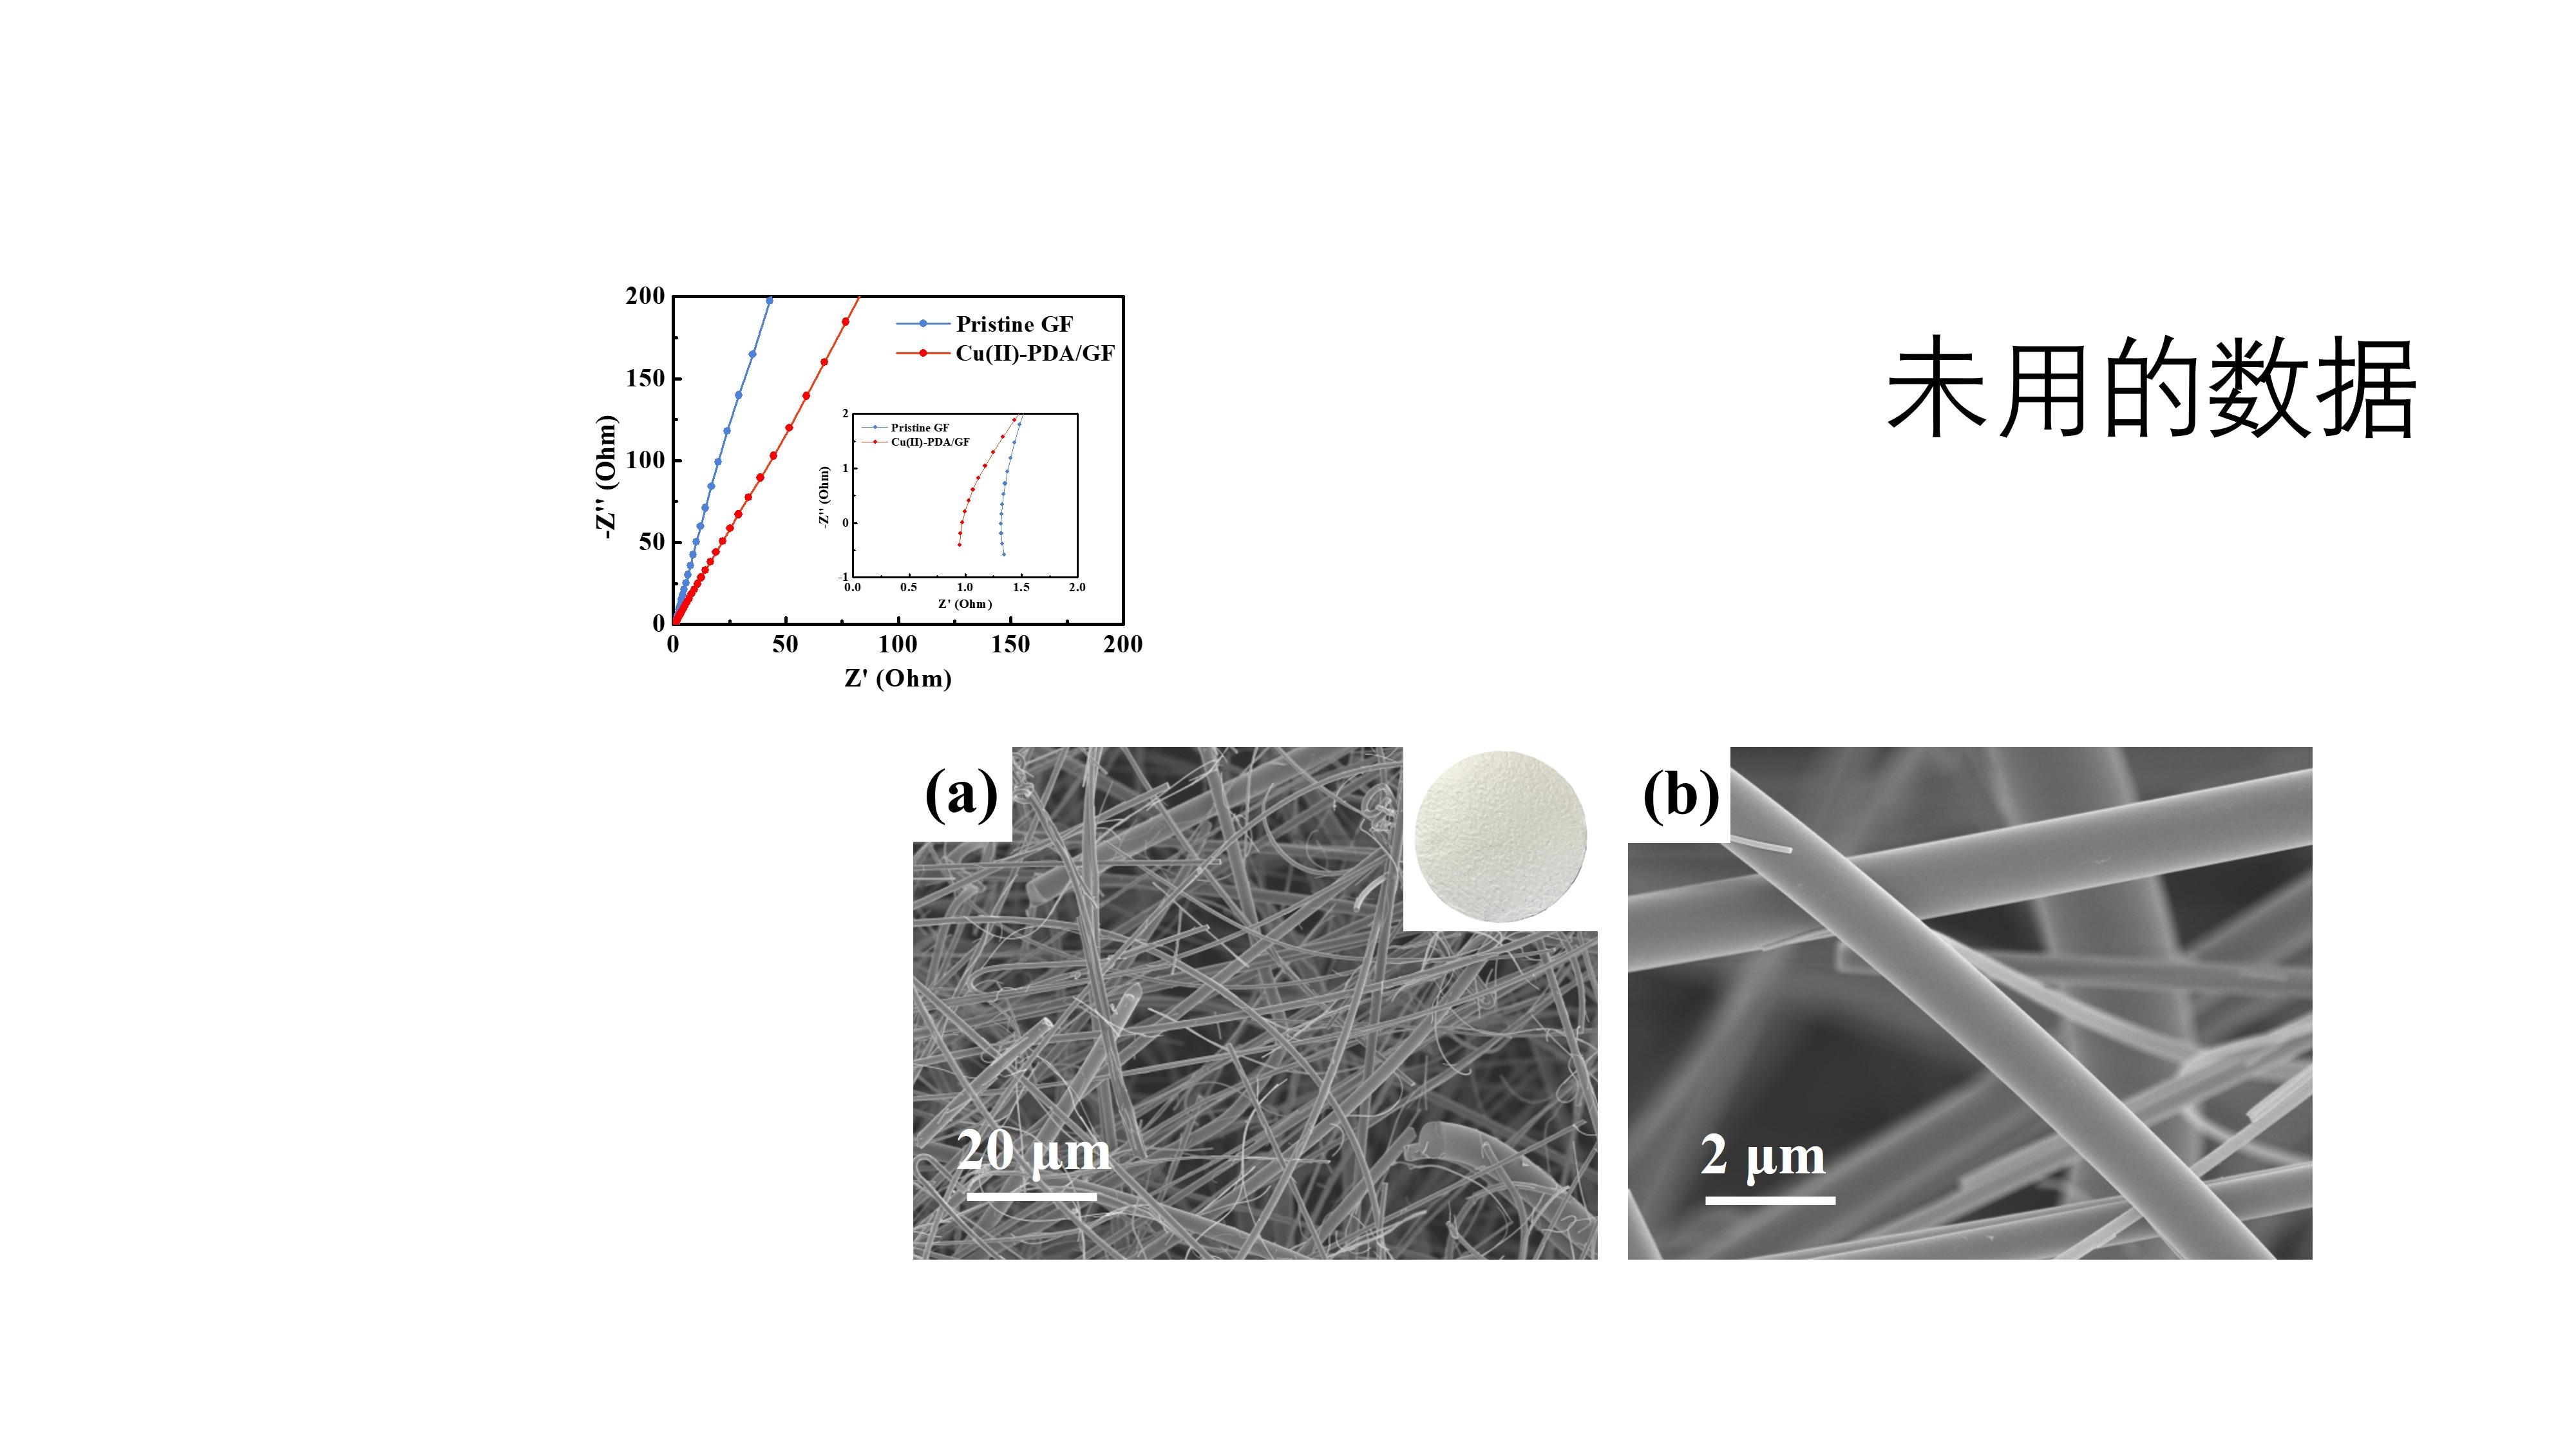


**Figure S2.** EIS test of the stainless steel//stainless steel cells with different separators.

**
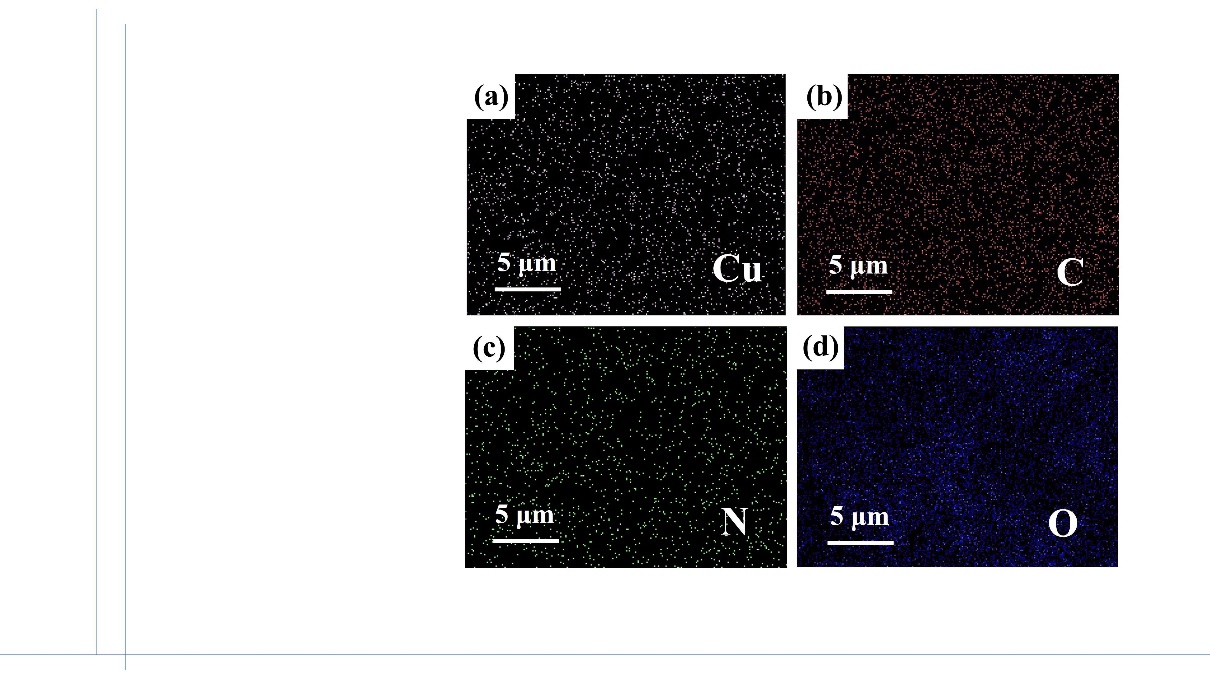
**

**Figure S3.** EDS images of Zn foils after Zn deposition for 10 min at 1 mA cm−2. In the symmetric cells using Cu(II)-PDA/GF separator.


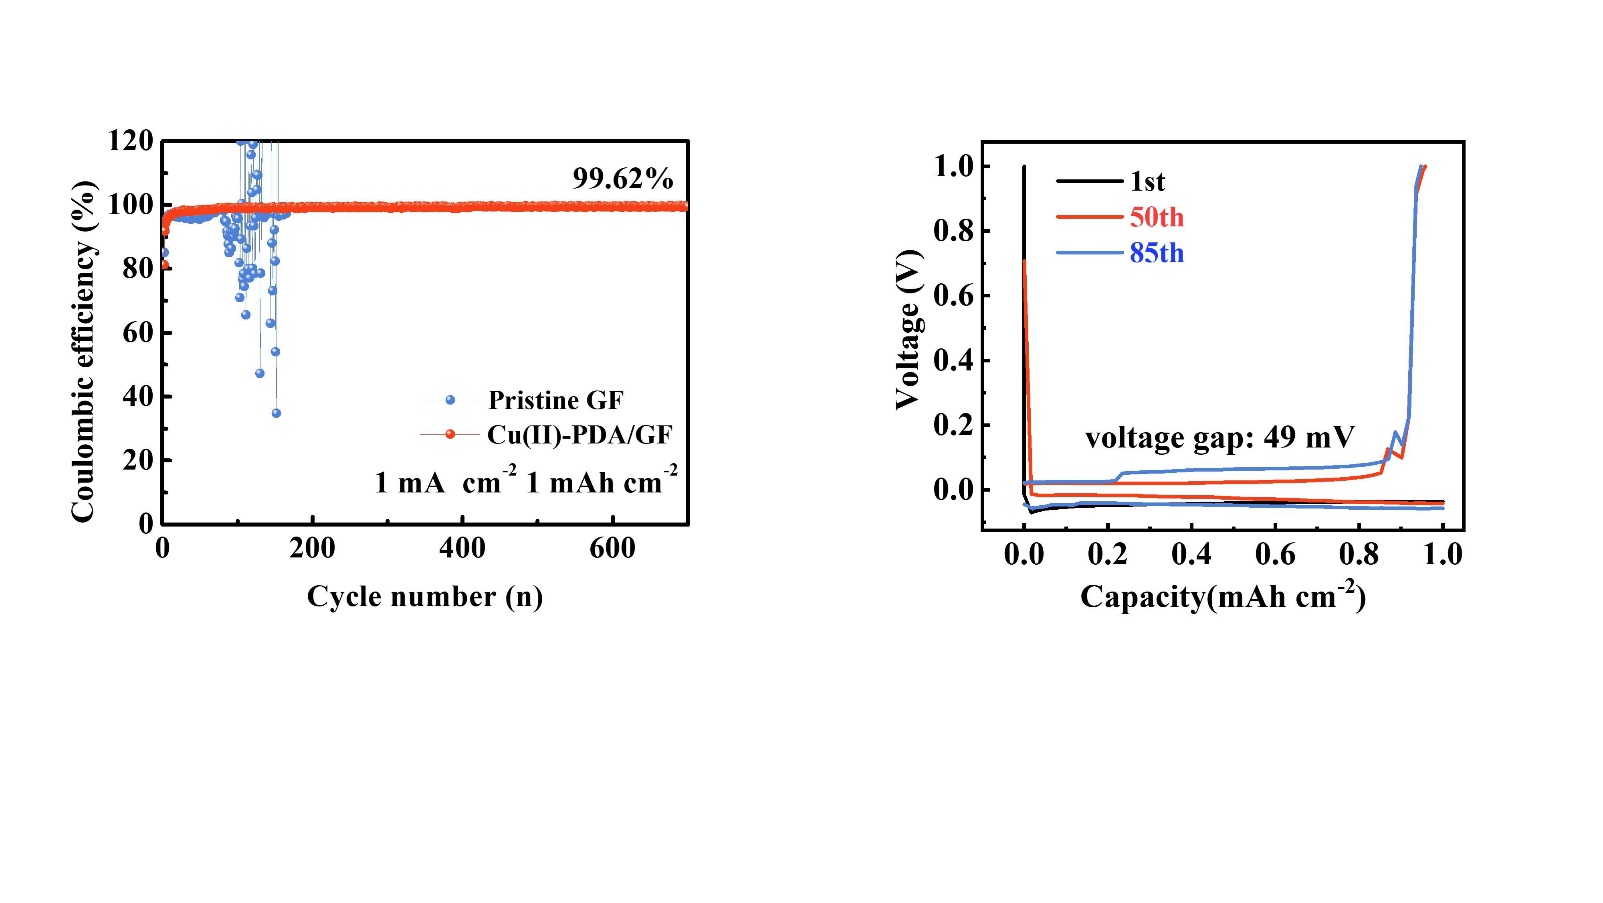


**Figure S4.** Coulombic efficiency of Zn plating/stripping on Cu at the current density of 1 mA cm-2 with the fixed capacity of 1 mAh cm-2 in Cu//Zn cells with different separators.

|  |
| --- |
|  | 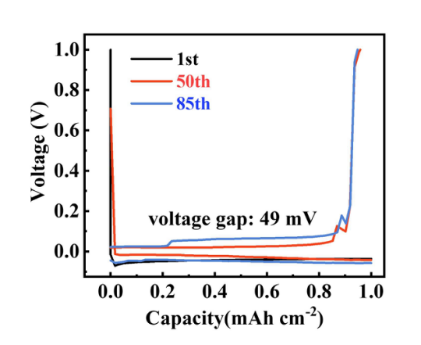 |

**Figure S5.** Voltage and capacity distribution of Cu//Zn cells with pristine GF separator.


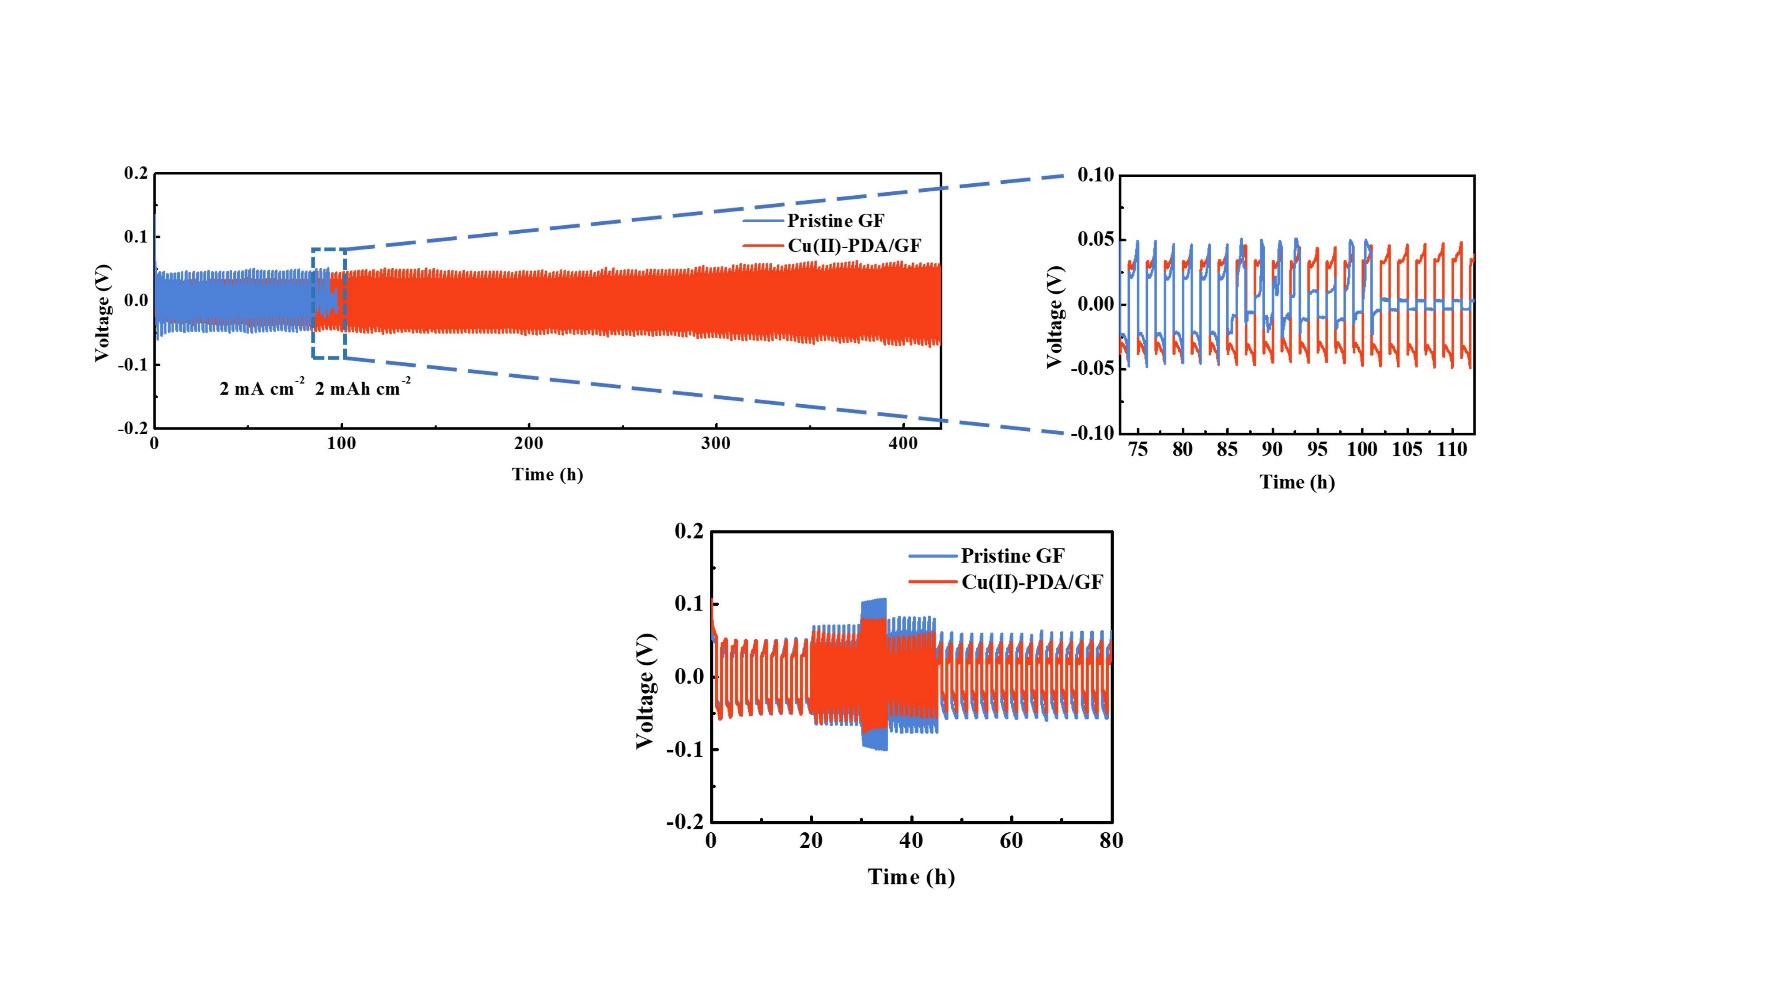


**Figure S6.** Cycling performance of the symmetrical cells with pristine GF and Cu(II)-PDA/GF separator at the current density of 2 mA cm-2 with the fixed capacity of 2 mAh cm-2.

**Table S1.** Data for GF and Cu-PDA/GF separators obtained from electrolyte absorption experiments.

| Separators | GF | Cu(II)-PDA/GF |
| --- | --- | --- |
| Wa(g) | 0.02491 | 0.02419 |
| Wb(g) | 0.4085 | 0.5644 |
| Electrolyte absorption (%) | 1540 | 2234 |
